# Supplementary material
Source: PubMed Central journal article supplement (PMC1458658)

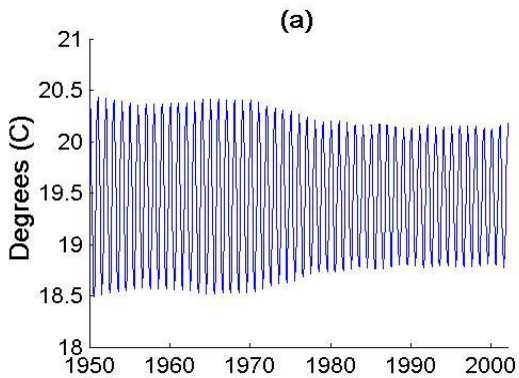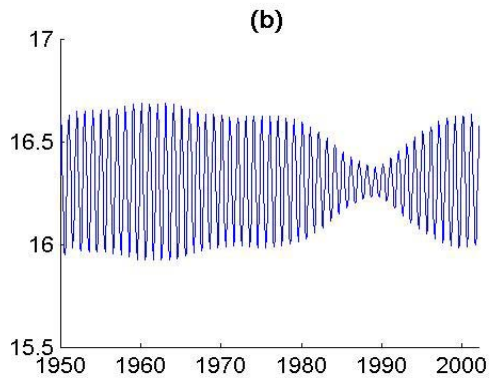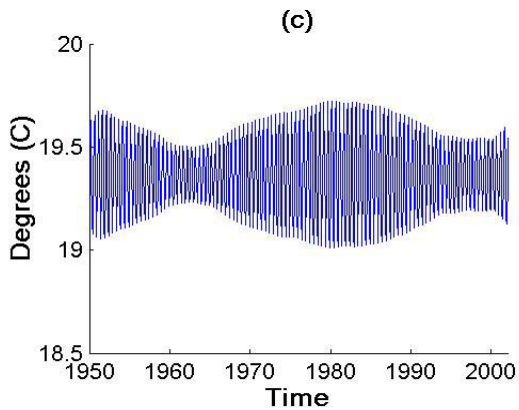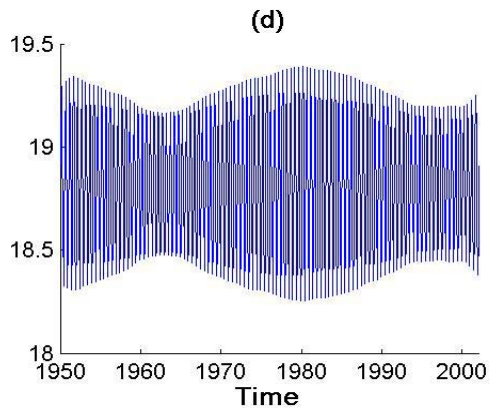

Supplement: pnas_0508929103_1.pdf [file pnas_0508929103_1.pdf]

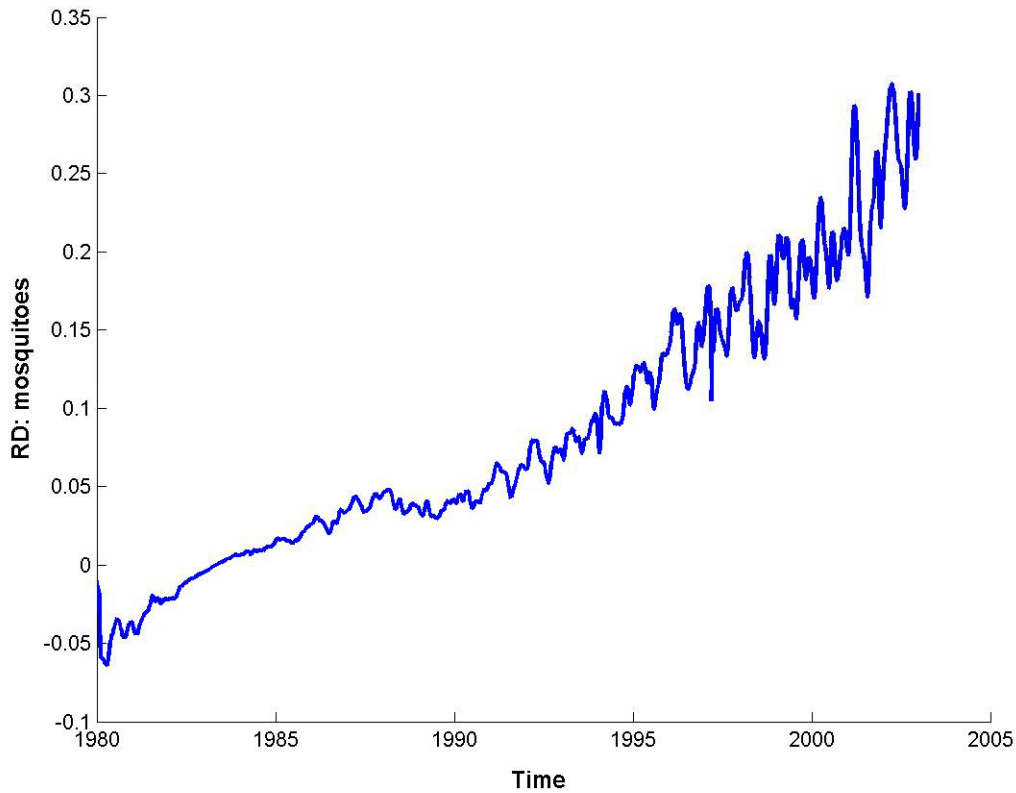

Supplement: pnas_0508929103_2.pdf [file pnas_0508929103_2.pdf]

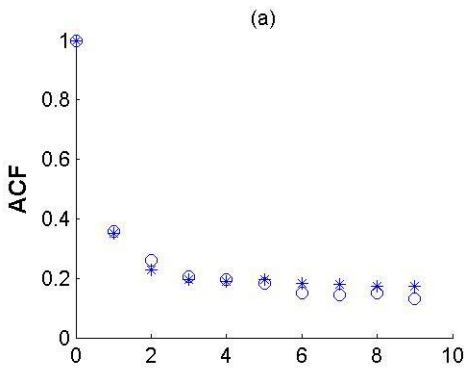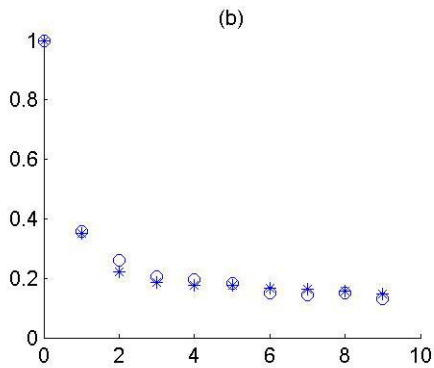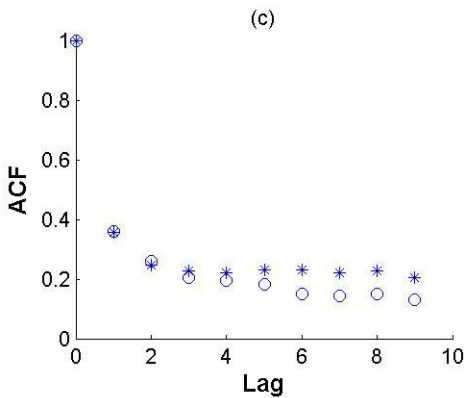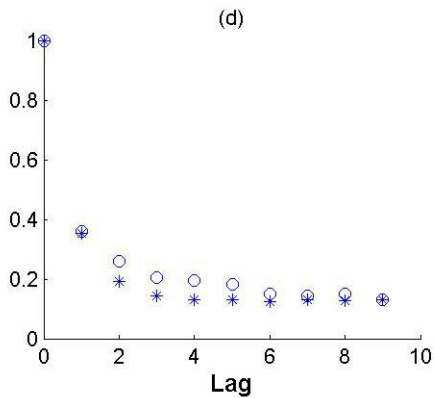

Supplement: pnas_0508929103_3.pdf [file pnas_0508929103_3.pdf]
